# Supplementary material
Source: PubMed Central journal article supplement (PMC11270864)
Supplement: jb.00091-24-s0001.pdf [file jb.00091-24-s0001.pdf]

**Supplementary Figure 1. Expression of TagBFP from Tet-On using higher concentrations of aTc.**

A549 cell monolayers were infected with *R. parkeri* harboring a plasmid containing Tet-On::*tagbfp*. aTc was added 16 hpi and samples were fixed at 28 hpi. 12 h induction was used to minimize toxic effects from high concentrations of aTc. Fixed samples were imaged using spinning disk confocal fluorescent microscopy. All images were set to the same minimum and maximum grey values per channel for comparison of BFP intensity. Scale bar, 5  $\mu$ m.
