# Supplementary material
Source: PubMed Central journal article supplement (PMC11270864)
Supplement: jb.00091-24-s0002.pdf [file jb.00091-24-s0002.pdf]

### Supplementary Figure 2. Expression of TagBFP from engineered aTc-responsive rickettsial promoters.

(Left) A549 cell monolayers were infected with *R. parkeri* harboring a plasmid that expressed *tagbfp* from various promoters. The strong rickettsial promoters  $P_{ompA}$  and  $P_{ompB}$  were engineered to be aTc-responsive by adding *tetO* sites into the promoters. aTc was added 4 hpi and samples were fixed at 28 hpi. The samples were subsequently imaged via spinning disk confocal fluorescent microscopy. All images were set to the same minimum and maximum grey values per channel for comparison of BFP intensity. Red arrow indicates bacterium with no detectable *tagbfp* expression, blue arrowhead indicates bacterium expressing *tagbfp*. Scale bar, 10  $\mu$ m. (Right) Schematic of rickettsial promoters engineered to be aTc-inducible. Diagrams not drawn to scale.
