# Supplementary material
Source: PubMed Central journal article supplement (PMC11270864)
Supplement: jb.00091-24-s0003.pdf [file jb.00091-24-s0003.pdf]

| #       | dCas9        | Description                                                         | gRNA Sequence         | Notes                                                              |
|---------|--------------|---------------------------------------------------------------------|-----------------------|--------------------------------------------------------------------|
| pRL0234 | <i>Spyo</i>  | P_Tet-ON_dCas9_Spyo_HA + SapI-containing gRNA                       | GGAAGAGCACGGCAGCTCTTC | Suspected off-target effects, pRL0348 served as non-target instead |
| pRL0235 | <i>Sthe1</i> | P_Tet-ON_dCas9_Sthe1_HA + SapI-containing gRNA (used as non-target) | GGAAGAGCACGGCAGCTCTTC |                                                                    |
| pRL0236 | <i>Sthe3</i> | P_Tet-ON_dCas9_Sthe3_HA + SapI-containing gRNA (used as non-target) | GGAAGAGCACGGCAGCTCTTC |                                                                    |
| pRL0237 | <i>Spas</i>  | P_Tet-ON_dCas9_Spas_HA + SapI-containing gRNA (used as non-target)  | GGAAGAGCACGGCAGCTCTTC |                                                                    |
| pRL0348 | <i>Spyo</i>  | <i>Spyo</i> dCas9 non-target                                        | TCACGAATACGACGGTGGG   |                                                                    |
| pRL0246 | <i>Sthe3</i> | gRNA1 targeting rifR                                                | CGACACCTTTCTCCTCACCG  |                                                                    |
| pRL0247 | <i>Sthe3</i> | gRNA2 targeting rifR                                                | GGCTTCGGCATTCTCCTCAC  |                                                                    |
| pRL0248 | <i>Sthe3</i> | gRNA3 targeting rifR                                                | TAAATACAAATTATAAGGTG  |                                                                    |
| pRL0267 | <i>Spyo</i>  | gRNA1 targeting rifR                                                | CGACACCTTTCTCCTCACCG  |                                                                    |
| pRL0268 | <i>Spyo</i>  | gRNA2 targeting rifR                                                | ACAGTAAACTTACACGGGTG  |                                                                    |
| pRL0269 | <i>Spyo</i>  | gRNA3 targeting rifR                                                | TAAATACAAATTATAAGGTG  |                                                                    |
| pRL0249 | <i>Sthe1</i> | gRNA1 targeting rifR                                                | GGTGAATTCTCACCACGGTGA |                                                                    |
| pRL0251 | <i>Sthe1</i> | gRNA2 targeting rifR                                                | ACACCTTTCTCCTCACCGTGG |                                                                    |
| pRL0250 | <i>Sthe1</i> | gRNA3 targeting rifR                                                | TAAATACAAATTATAAGGTGA |                                                                    |
| pRL0252 | <i>Spas</i>  | gRNA1 targeting rifR                                                | CGACACCTTTCTCCTCACCG  |                                                                    |
| pRL0260 | <i>Spas</i>  | gRNA2 targeting rifR                                                | GAATTACAGTAACTTACAC   |                                                                    |
| pRL0261 | <i>Spas</i>  | gRNA3 targeting rifR                                                | ATATCTAAATACAAATTATA  |                                                                    |
| pRL0280 | <i>Spas</i>  | pAW08 + gRNA1 targeting Sca2                                        | TATATAATTTTTGTTAACTT  |                                                                    |
| pRL0312 | <i>Spas</i>  | pAW08 + gRNA2 targeting Sca2                                        | TATTATTTTTTATATAAACG  |                                                                    |
